# Supplementary material for: Physical deterioration and adaptive recovery in physically inactive breast cancer patients during adjuvant chemotherapy: a randomised controlled trial
Source: PubMed Central journal article supplement (PMC7297957; doi:10.1038/s41598-020-66513-9), 2020-06-16
Supplement: 41598_2020_66513_MOESM1_ESM.pdf [file 41598_2020_66513_MOESM1_ESM.pdf]

**Title:**

**Physical deterioration and adaptive recovery in physically inactive breast cancer patients during adjuvant chemotherapy: a randomised controlled trial**

**Author block**

Tom Møller (RN, MPH, PhD), Christina Andersen (RN, MPH PhD), Christian Lillelund (physiotherapist, MSc), Kira Bloomquist (physiotherapist, MSc, PhD), Karl Bang Christensen (MSc, PhD), Bent Ejlersen (MD, PhD), Malgorzata Tuxen (MD PhD), Peter Oturai (MD), Ulla Breitenstein (RN), Cecilie Kolind (RN), Pernille Travis (RN), Tina Bjerg (RN), Mikael Rørth (MD) and Lis Adamsen, (RN, MSocSc, PhD)

Supplementary file: EORTC-QLQ-C30

| variable                            | gr | n  | Mean (SD) |         |         |         | $\Delta$<br>(95% CI) | P      | Diff.<br>(95% CI) | P      |
|-------------------------------------|----|----|-----------|---------|---------|---------|----------------------|--------|-------------------|--------|
|                                     |    |    | 0         | 6       | 12      | 39      |                      |        |                   |        |
| EORTC<br>Global<br>Health<br>Status | 1  | 60 | 60 (21)   | 52 (24) |         |         | -8 (-14 to -3)       | 0.0021 | -6 (-14 to 1)     | 0.1125 |
|                                     |    | 12 | 62 (19)   |         |         |         |                      |        |                   |        |
|                                     | 2  | 60 | 60 (21)   | 58 (23) |         |         | -2 (-8 to 3)         | 0.3780 |                   |        |
|                                     |    | 16 | 67 (21)   |         |         |         |                      |        |                   |        |
|                                     | 1  | 59 | 61 (21)   |         | 56 (22) |         | -4 (-10 to 2)        | 0.1905 | 6 (-2 to 15)      | 0.1288 |
|                                     |    | 13 | 56 (17)   |         |         |         |                      |        |                   |        |
|                                     | 2  | 63 | 62 (22)   |         | 51 (20) |         | -11 (-16 to -5)      | 0.0005 |                   |        |
|                                     |    | 13 | 62 (20)   |         |         |         |                      |        |                   |        |
|                                     | 1  | 59 | 62 (21)   |         |         | 76 (19) | 15 (9 to 21)         | <.0001 | 8 (0 to 16)       | 0.0517 |
|                                     |    | 13 | 51 (19)   |         |         |         |                      |        |                   |        |
|                                     | 2  | 55 | 63 (21)   |         |         | 69 (23) | 7 (1 to 13)          | 0.0208 |                   |        |
|                                     |    | 21 | 58 (23)   |         |         |         |                      |        |                   |        |
| EORTC<br>Physical<br>Functioning    | 1  | 60 | 87 (12)   | 88 (12) |         |         | 0 (-3 to 3)          | 0.8382 | 1 (-3 to 5)       | 0.5762 |
|                                     |    | 12 | 90 (7)    |         |         |         |                      |        |                   |        |
|                                     | 2  | 60 | 87 (13)   | 86 (13) |         |         | -2 (-4 to 1)         | 0.3167 |                   |        |
|                                     |    | 16 | 92 (10)   |         |         |         |                      |        |                   |        |
|                                     | 1  | 59 | 87 (12)   |         | 89 (12) |         | 1 (-2 to 5)          | 0.5170 | 6 (1 to 11)       | 0.0175 |
|                                     |    | 13 | 90 (8)    |         |         |         |                      |        |                   |        |
|                                     | 2  | 63 | 87 (13)   |         | 82 (16) |         | -5 (-8 to -1)        | 0.0062 |                   |        |
|                                     |    | 13 | 91 (8)    |         |         |         |                      |        |                   |        |
|                                     | 1  | 59 | 88 (12)   |         |         | 91 (13) | 4 (0 to 7)           | 0.0297 | 4 (-1 to 8)       | 0.1303 |
|                                     |    | 13 | 87 (7)    |         |         |         |                      |        |                   |        |
|                                     | 2  | 55 | 89 (12)   |         |         | 88 (13) | 0 (-3 to 3)          | 0.9777 |                   |        |
|                                     |    | 21 | 85 (15)   |         |         |         |                      |        |                   |        |
| EORTC<br>Role<br>Functioning        | 1  | 60 | 67 (30)   | 64 (29) |         |         | -6 (-14 to 2)        | 0.1565 | -5 (-17 to 6)     | 0.3436 |
|                                     |    | 12 | 88 (20)   |         |         |         |                      |        |                   |        |
|                                     | 2  | 60 | 62 (30)   | 63 (31) |         |         | 0 (-8 to 8)          | 0.9313 |                   |        |
|                                     |    | 16 | 74 (29)   |         |         |         |                      |        |                   |        |
|                                     | 1  | 59 | 68 (30)   |         | 61 (28) |         | -9 (-17 to -1)       | 0.0297 | -3 (-14 to 8)     | 0.5857 |

|                                  |   |    |         |         |         |         |                 |        |                |        |
|----------------------------------|---|----|---------|---------|---------|---------|-----------------|--------|----------------|--------|
|                                  |   | 13 | 81 (24) |         |         |         |                 |        |                |        |
|                                  | 2 | 63 | 62 (30) |         | 58 (26) |         | -6 (-13 to 2)   | 0.1411 |                |        |
|                                  |   | 13 | 76 (28) |         |         |         |                 |        |                |        |
|                                  | 1 | 59 | 71 (28) |         |         | 84 (19) | 13 (5 to 21)    | 0.0016 | 0 (-11 to 11)  | 0.9816 |
|                                  |   | 13 | 71 (34) |         |         |         |                 |        |                |        |
|                                  | 2 | 55 | 65 (29) |         |         | 78 (30) | 13 (5 to 21)    | 0.0016 |                |        |
|                                  |   | 21 | 63 (32) |         |         |         |                 |        |                |        |
| EORTC<br>Emotional<br>Functionin | 1 | 60 | 79 (21) | 80 (21) |         |         | 1 (-3 to 5)     | 0.6746 | -4 (-10 to 2)  | 0.2192 |
|                                  |   | 12 | 77 (20) |         |         |         |                 |        |                |        |
|                                  | 2 | 60 | 73 (20) | 78 (21) |         |         | 5 (0 to 9)      | 0.0316 |                |        |
|                                  |   | 16 | 67 (24) |         |         |         |                 |        |                |        |
|                                  | 1 | 59 | 79 (21) |         | 78 (24) |         | -1 (-6 to 3)    | 0.6060 | -4 (-10 to 3)  | 0.2524 |
|                                  |   | 13 | 79 (21) |         |         |         |                 |        |                |        |
|                                  | 2 | 63 | 74 (20) |         | 76 (20) |         | 2 (-2 to 7)     | 0.2656 |                |        |
|                                  |   | 13 | 62 (21) |         |         |         |                 |        |                |        |
| EORTC<br>Cognitive<br>functionin | 1 | 59 | 79 (21) |         |         | 82 (21) | 3 (-2 to 7)     | 0.2806 | -1 (-8 to 5)   | 0.6640 |
|                                  |   | 13 | 76 (20) |         |         |         |                 |        |                |        |
|                                  | 2 | 55 | 74 (20) |         |         | 78 (21) | 4 (-1 to 9)     | 0.0981 |                |        |
|                                  |   | 21 | 66 (23) |         |         |         |                 |        |                |        |
| EORTC<br>Cognitive<br>functionin | 1 | 60 | 78 (21) | 68 (26) |         |         | -10 (-16 to -5) | 0.0004 | -9 (-17 to -1) | 0.0247 |
|                                  |   | 12 | 81 (22) |         |         |         |                 |        |                |        |
|                                  | 2 | 60 | 73 (21) | 71 (28) |         |         | -1 (-7 to 4)    | 0.6681 |                |        |
|                                  |   | 16 | 65 (30) |         |         |         |                 |        |                |        |
|                                  | 1 | 59 | 78 (22) |         | 71 (22) |         | -7 (-13 to -2)  | 0.0077 | -3 (-10 to 5)  | 0.4751 |
|                                  |   | 13 | 79 (21) |         |         |         |                 |        |                |        |
|                                  | 2 | 63 | 73 (21) |         | 67 (25) |         | -5 (-10 to 1)   | 0.0804 |                |        |
|                                  |   | 13 | 65 (32) |         |         |         |                 |        |                |        |
|                                  | 1 | 59 | 77 (22) |         |         | 76 (23) | -2 (-7 to 4)    | 0.5244 | -4 (-12 to 4)  | 0.3614 |
|                                  |   | 13 | 81 (21) |         |         |         |                 |        |                |        |
|                                  | 2 | 55 | 75 (19) |         |         | 76 (22) | 2 (-4 to 8)     | 0.5123 |                |        |
|                                  |   | 21 | 62 (31) |         |         |         |                 |        |                |        |
|                                  | 1 | 60 | 76 (23) | 71 (23) |         |         | -6 (-12 to 0)   | 0.0356 | -4 (-12 to 4)  | 0.2725 |
|                                  |   | 12 | 88 (16) |         |         |         |                 |        |                |        |

|                                 |    |         |         |         |         |         |                 |                 |               |               |        |
|---------------------------------|----|---------|---------|---------|---------|---------|-----------------|-----------------|---------------|---------------|--------|
| EORTC<br>Social<br>Functioning  | 2  | 60      | 78 (24) | 76 (26) |         |         | -2 (-7 to 4)    | 0.5653          |               |               |        |
|                                 |    | 16      | 80 (24) |         |         |         |                 |                 |               |               |        |
|                                 | 1  | 59      | 76 (24) |         | 68 (24) |         |                 | -9 (-15 to -3)  | 0.0055        | 1 (-8 to 10)  | 0.7877 |
|                                 |    | 13      | 85 (16) |         |         |         |                 |                 |               |               |        |
|                                 | 2  | 63      | 79 (23) |         | 68 (28) |         |                 | -10 (-16 to -4) | 0.0013        |               |        |
|                                 |    | 13      | 76 (24) |         |         |         |                 |                 |               |               |        |
| 1                               | 59 | 77 (23) |         |         | 86 (22) |         | 9 (2 to 15)     | 0.0078          | 2 (-7 to 11)  | 0.6490        |        |
|                                 | 13 | 78 (21) |         |         |         |         |                 |                 |               |               |        |
| 2                               | 55 | 82 (20) |         |         | 86 (18) |         | 7 (0 to 13)     | 0.0435          |               |               |        |
|                                 | 21 | 69 (29) |         |         |         |         |                 |                 |               |               |        |
| EORTC<br>Fatigue                | 1  | 60      | 42 (25) | 52 (26) |         |         | 10 (3 to 17)    | 0.0036          | 8 (-2 to 18)  | 0.0977        |        |
|                                 |    | 12      | 39 (28) |         |         |         |                 |                 |               |               |        |
|                                 | 2  | 60      | 49 (25) | 50 (26) |         |         |                 | 2 (-5 to 9)     | 0.5333        |               |        |
|                                 |    | 16      | 40 (32) |         |         |         |                 |                 |               |               |        |
|                                 | 1  | 59      | 42 (25) |         | 58 (27) |         |                 | 17 (9 to 25)    | <.0001        | 5 (-6 to 16)  | 0.3491 |
|                                 |    | 13      | 41 (28) |         |         |         |                 |                 |               |               |        |
|                                 | 2  | 63      | 48 (25) |         | 59 (25) |         |                 | 12 (4 to 19)    | 0.0033        |               |        |
|                                 |    | 13      | 44 (32) |         |         |         |                 |                 |               |               |        |
|                                 | 1  | 59      | 40 (25) |         |         | 29 (24) |                 | -12 (-18 to -5) | 0.0005        | -4 (-13 to 6) | 0.4300 |
|                                 |    | 13      | 51 (29) |         |         |         |                 |                 |               |               |        |
| 2                               | 55 | 46 (24) |         |         | 38 (26) |         | -8 (-15 to -1)  | 0.0168          |               |               |        |
|                                 | 21 | 50 (33) |         |         |         |         |                 |                 |               |               |        |
| EORTC<br>Nausea and<br>vomiting | 1  | 60      | 17 (22) | 10 (16) |         |         | -6 (-12 to 0)   | 0.0353          | -4 (-12 to 4) | 0.3212        |        |
|                                 |    | 11      | 12 (21) |         |         |         |                 |                 |               |               |        |
|                                 | 2  | 60      | 18 (20) | 16 (20) |         |         |                 | -2 (-8 to 4)    | 0.4610        |               |        |
|                                 |    | 16      | 19 (23) |         |         |         |                 |                 |               |               |        |
|                                 | 1  | 59      | 16 (23) |         | 6 (12)  |         |                 | -10 (-15 to -4) | 0.0008        | 3 (-5 to 11)  | 0.4205 |
|                                 |    | 12      | 14 (20) |         |         |         |                 |                 |               |               |        |
|                                 | 2  | 63      | 17 (20) |         | 5 (16)  |         |                 | -13 (-18 to -7) | <.0001        |               |        |
|                                 |    | 13      | 23 (24) |         |         |         |                 |                 |               |               |        |
|                                 | 1  | 59      | 16 (23) |         |         | 2 (7)   |                 | -14 (-19 to -9) | <.0001        | 0 (-7 to 7)   | 0.9428 |
|                                 |    | 12      | 15 (19) |         |         |         |                 |                 |               |               |        |
| 2                               | 55 | 15 (17) |         |         | 4 (9)   |         | -14 (-19 to -9) | <.0001          |               |               |        |

|                |    |         |         |         |         |              |               |              |               |        |
|----------------|----|---------|---------|---------|---------|--------------|---------------|--------------|---------------|--------|
|                |    | 21      | 25 (27) |         |         |              |               |              |               |        |
| EORTC Pain     | 1  | 60      | 17 (21) | 31 (32) |         |              | 15 (7 to 24)  | 0.0004       | 9 (-3 to 21)  | 0.1357 |
|                |    | 12      | 10 (15) |         |         |              |               |              |               |        |
|                | 2  | 60      | 22 (26) | 29 (31) |         |              | 6 (-2 to 15)  | 0.1236       |               |        |
|                |    | 16      | 26 (31) |         |         |              |               |              |               |        |
|                | 1  | 59      | 18 (21) |         | 32 (30) |              | 16 (8 to 24)  | <.0001       | -3 (-14 to 8) | 0.6209 |
|                |    | 13      | 9 (15)  |         |         |              |               |              |               |        |
|                | 2  | 63      | 22 (26) |         | 42 (29) |              | 19 (11 to 27) | <.0001       |               |        |
|                |    | 13      | 28 (31) |         |         |              |               |              |               |        |
| 1              | 59 | 17 (20) |         |         | 22 (22) | 6 (-1 to 12) | 0.0778        | 6 (-3 to 15) | 0.1973        |        |
|                | 13 | 13 (22) |         |         |         |              |               |              |               |        |
| 2              | 55 | 20 (24) |         |         | 21 (23) | 0 (-7 to 6)  | 0.9464        |              |               |        |
|                | 21 | 30 (31) |         |         |         |              |               |              |               |        |
| EORTC Dyspnoea | 1  | 59      | 10 (22) | 20 (23) |         |              | 11 (4 to 17)  | 0.0026       | 4 (-5 to 14)  | 0.3656 |
|                |    | 12      | 8 (15)  |         |         |              |               |              |               |        |
|                | 2  | 60      | 13 (22) | 19 (27) |         |              | 6 (-1 to 13)  | 0.0707       |               |        |
|                |    | 16      | 17 (30) |         |         |              |               |              |               |        |
|                | 1  | 58      | 10 (22) |         | 28 (31) |              | 18 (9 to 27)  | 0.0001       | 2 (-11 to 14) | 0.7901 |
|                |    | 13      | 8 (15)  |         |         |              |               |              |               |        |
|                | 2  | 63      | 12 (22) |         | 30 (31) |              | 16 (8 to 25)  | 0.0003       |               |        |
|                |    | 13      | 21 (32) |         |         |              |               |              |               |        |
| 1              | 58 | 10 (22) |         |         | 10 (19) | 0 (-7 to 7)  | 0.9566        | 0 (-10 to 9) | 0.9885        |        |
|                | 13 | 8 (15)  |         |         |         |              |               |              |               |        |
| 2              | 55 | 8 (17)  |         |         | 12 (22) | 0 (-6 to 7)  | 0.9407        |              |               |        |
|                | 21 | 27 (33) |         |         |         |              |               |              |               |        |
| EORTC Insomnia | 1  | 60      | 23 (31) | 36 (36) |         |              | 12 (4 to 20)  | 0.0049       | 13 (1 to 24)  | 0.0324 |
|                |    | 12      | 28 (28) |         |         |              |               |              |               |        |
|                | 2  | 60      | 33 (29) | 32 (31) |         |              | -1 (-9 to 7)  | 0.8519       |               |        |
|                |    | 16      | 29 (21) |         |         |              |               |              |               |        |
|                | 1  | 59      | 24 (32) |         | 45 (36) |              | 21 (12 to 31) | <.0001       | 8 (-5 to 21)  | 0.2199 |
|                |    | 13      | 26 (28) |         |         |              |               |              |               |        |
|                | 2  | 63      | 33 (29) |         | 46 (32) |              | 13 (4 to 22)  | 0.0050       |               |        |
|                |    | 13      | 28 (18) |         |         |              |               |              |               |        |

|                           |                       |          |                    |                    |         |         |                 |               |                |              |        |
|---------------------------|-----------------------|----------|--------------------|--------------------|---------|---------|-----------------|---------------|----------------|--------------|--------|
|                           | 1                     | 59<br>13 | 24 (32)<br>26 (28) |                    |         | 31 (36) | 6 (-3 to 15)    | 0.1834        | 2 (-12 to 15)  | 0.8132       |        |
|                           | 2                     | 55<br>21 | 33 (30)<br>32 (20) |                    |         | 36 (36) | 5 (-5 to 14)    | 0.3296        |                |              |        |
| EORTC<br>Appetite<br>loss | 1                     | 60<br>12 | 18 (25)<br>14 (17) | 20 (29)            |         |         | 2 (-5 to 10)    | 0.5686        | -3 (-13 to 8)  | 0.6144       |        |
|                           | 2                     | 60<br>16 | 20 (28)<br>21 (30) | 25 (30)            |         |         | 5 (-3 to 12)    | 0.1988        |                |              |        |
|                           | 1                     | 59<br>13 | 19 (25)<br>13 (17) |                    | 19 (27) |         | 1 (-7 to 10)    | 0.7407        | -1 (-13 to 11) | 0.9076       |        |
|                           | 2                     | 63<br>13 | 20 (27)<br>23 (32) |                    | 22 (30) |         | 2 (-6 to 11)    | 0.6117        |                |              |        |
|                           | 1                     | 59<br>13 | 19 (25)<br>10 (16) |                    |         | 6 (18)  | -12 (-19 to -6) | 0.0002        | 2 (-7 to 11)   | 0.6556       |        |
|                           | 2                     | 55<br>21 | 19 (27)<br>24 (30) |                    |         | 5 (14)  | -14 (-21 to -8) | <.0001        |                |              |        |
|                           | EORTC<br>Constipation | 1        | 60<br>12           | 21 (26)<br>8 (21)  | 16 (23) |         |                 | -4 (-11 to 3) | 0.2805         | 3 (-7 to 13) | 0.5727 |
|                           |                       | 2        | 60<br>16           | 26 (29)<br>23 (23) | 18 (24) |         |                 | -7 (-14 to 0) | 0.0598         |              |        |
| 1                         |                       | 59<br>13 | 20 (26)<br>13 (22) |                    | 16 (25) |         | -3 (-10 to 4)   | 0.3347        | 4 (-5 to 14)   | 0.3692       |        |
| 2                         |                       | 63<br>13 | 25 (29)<br>28 (23) |                    | 17 (26) |         | -8 (-15 to -1)  | 0.0235        |                |              |        |
| 1                         |                       | 59<br>13 | 21 (26)<br>10 (21) |                    |         | 5 (14)  | -14 (-21 to -7) | <.0001        | 2 (-8 to 11)   | 0.6956       |        |
| 2                         |                       | 55<br>21 | 25 (27)<br>25 (30) |                    |         | 10 (22) | -16 (-23 to -9) | <.0001        |                |              |        |
| EORTC<br>Diarrhoea        |                       | 1        | 60<br>12           | 12 (24)<br>14 (17) | 22 (28) |         |                 | 10 (3 to 16)  | 0.0039         | 4 (-5 to 13) | 0.4235 |
|                           |                       | 2        | 60<br>15           | 13 (25)<br>18 (28) | 19 (26) |         |                 | 6 (-1 to 12)  | 0.0717         |              |        |
|                           | 1                     | 59       | 11 (24)            |                    | 19 (26) |         | 7 (-1 to 14)    | 0.0959        | -6 (-17 to 5)  | 0.2631       |        |

|                                  |    |        |         |        |         |              |               |        |               |        |
|----------------------------------|----|--------|---------|--------|---------|--------------|---------------|--------|---------------|--------|
|                                  |    | 13     | 15 (17) |        |         |              |               |        |               |        |
|                                  | 2  | 63     | 12 (25) |        | 26 (28) |              | 13 (5 to 20)  | 0.0011 |               |        |
|                                  |    | 12     | 22 (30) |        |         |              |               |        |               |        |
|                                  | 1  | 59     | 12 (24) |        |         | 7 (19)       | -5 (-13 to 3) | 0.2059 | 0 (-11 to 10) | 0.9306 |
|                                  |    | 13     | 13 (17) |        |         |              |               |        |               |        |
|                                  | 2  | 55     | 8 (17)  |        |         | 9 (22)       | -4 (-12 to 3) | 0.2551 |               |        |
|                                  |    | 20     | 30 (37) |        |         |              |               |        |               |        |
| EORTC<br>Financial<br>difficulti | 1  | 60     | 6 (21)  | 6 (21) |         |              | 1 (-3 to 4)   | 0.7714 | 1 (-4 to 6)   | 0.8161 |
|                                  |    | 12     | 6 (13)  |        |         |              |               |        |               |        |
|                                  | 2  | 60     | 6 (18)  | 7 (19) |         |              | 0 (-4 to 4)   | 0.9702 |               |        |
|                                  |    | 16     | 15 (24) |        |         |              |               |        |               |        |
|                                  | 1  | 59     | 6 (22)  |        | 8 (23)  |              | 3 (-1 to 7)   | 0.1452 | 3 (-3 to 8)   | 0.3262 |
|                                  |    | 13     | 5 (13)  |        |         |              |               |        |               |        |
|                                  | 2  | 63     | 6 (17)  |        | 6 (19)  |              | 0 (-3 to 4)   | 0.9262 |               |        |
|                                  |    | 13     | 18 (26) |        |         |              |               |        |               |        |
|                                  | 1  | 59     | 6 (22)  |        |         | 6 (21)       | 1 (-4 to 6)   | 0.7304 | 3 (-4 to 11)  | 0.3852 |
|                                  |    | 13     | 5 (13)  |        |         |              |               |        |               |        |
| 2                                | 55 | 7 (19) |         |        | 4 (13)  | -2 (-8 to 3) | 0.3769        |        |               |        |
|                                  |    | 21     | 11 (22) |        |         |              |               |        |               |        |

**Title:**

**Physical deterioration and adaptive recovery in physically inactive breast cancer patients during adjuvant chemotherapy: a randomised controlled trial**

**Author block**

Tom Møller (RN, MPH, PhD), Christina Andersen (RN, MPH PhD), Christian Lillelund (physiotherapist, MSc), Kira Bloomquist (physiotherapist, MSc, PhD), Karl Bang Christensen (MSc, PhD), Bent Ejlersen (MD, PhD), Malgorzata Tuxen (MD PhD), Peter Oturai (MD), Ulla Breitenstein (RN), Cecilie Kolind (RN), Pernille Travis (RN), Tina Bjerg (RN), Mikael Rørth (MD) and Lis Adamsen, (RN, MSocSc, PhD)

Supplementary file: Blood markers



| variable       |    | n         | Mean (SD)    |             |                  | $\Delta$ (95% CI)   | P      | Diff. (95% CI)       | P      |
|----------------|----|-----------|--------------|-------------|------------------|---------------------|--------|----------------------|--------|
|                |    |           | 0            | 12          | 39               |                     |        |                      |        |
| P-Glukose      | 1  | 60        | 5.6 (0.9)    | 5.7 (1.1)   |                  | 0.1 (-0.1 to 0.3)   | 0.1954 | 0.0 (-0.3 to 0.3)    | 0.9157 |
|                | 1  | 14        | 5.5 (1.6)    |             |                  |                     |        |                      |        |
|                | 2  | 61        | 5.5 (0.8)    | 5.6 (0.9)   |                  | 0.1 (-0.1 to 0.3)   | 0.2469 |                      |        |
|                | 2  | 15        | 5.1 (0.4)    |             |                  |                     |        |                      |        |
|                | 1  | 56        | 5.6 (0.9)    |             | 5.6 (1.1)        | 0.0 (-0.2 to 0.2)   | 0.9453 | 0.0 (-0.3 to 0.3)    |        |
|                | 1  | 18        | 5.6 (1.4)    |             |                  |                     |        |                      |        |
|                | 2  | 56        | 5.4 (0.8)    |             | 5.4 (1.0)        | 0.0 (-0.2 to 0.2)   | 0.7585 |                      |        |
|                | 2  | 20        | 5.4 (0.7)    |             |                  |                     |        |                      |        |
| P-Insulin      | 1  | 57        | 75.1 (51.5)  | 70.4 (50.4) |                  | -5.3 (-15.3 to 4.6) | 0.2923 | 1.9 (-12.3 to 16.1)  | 0.7893 |
|                | 1  | 16        | 75.2 (53.7)  |             |                  |                     |        |                      |        |
|                | 2  | 54        | 75.7 (68.4)  | 67.1 (61.4) |                  | -7.3 (-17.4 to 2.9) | 0.1587 |                      |        |
|                | 2  | 18        | 70.2 (55.1)  |             |                  |                     |        |                      |        |
|                | 1  | 52        | 75 (56.2)    |             | 67.6 (37.1)      | -6.7 (-17 to 3.6)   | 0.2008 | -2.1 (-16.7 to 12.5) |        |
|                | 1  | 21        | 75.4 (39.2)  |             |                  |                     |        |                      |        |
|                | 2  | 51        | 64.8 (34.1)  |             | 59.9 (27.7)      | -4.6 (-14.9 to 5.7) | 0.3808 |                      |        |
|                | 2  | 21        | 97.6 (106.3) |             |                  |                     |        |                      |        |
| P-kolesterol   | 1  | 63        | 5.3 (1.1)    | 5.3 (1.1)   |                  | 0.0 (-0.3 to 0.3)   | 0.9582 | -0.2 (-0.6 to 0.2)   | 0.3753 |
|                | 1  | 12        | 5.2 (1)      |             |                  |                     |        |                      |        |
|                | 2  | 62        | 5.4 (1.1)    | 5.5 (1.7)   |                  | 0.2 (-0.1 to 0.5)   | 0.2302 |                      |        |
|                | 2  | 14        | 4.8 (1.1)    |             |                  |                     |        |                      |        |
|                | 1  | 57        | 5.3 (1)      |             | 5.5 (1.1)        | 0.2 (-0.1 to 0.5)   | 0.1729 | 0.1 (-0.3 to 0.5)    |        |
|                | 1  | 18        | 5.1 (1.2)    |             |                  |                     |        |                      |        |
|                | 2  | 56        | 5.4 (1.2)    |             | 5.4 (1.1)        | 0.1 (-0.2 to 0.4)   | 0.4794 |                      |        |
|                | 2  | 20        | 4.9 (1.1)    |             |                  |                     |        |                      |        |
| HDL kolesterol | 1  | 63        | 1.6 (0.5)    | 1.3 (0.4)   |                  | -0.3 (-0.4 to -0.2) | <.0001 | -0.1 (-0.2 to 0.1)   | 0.3218 |
|                | 1  | 12        | 1.5 (0.4)    |             |                  |                     |        |                      |        |
|                | 2  | 62        | 1.5 (0.4)    | 1.3 (0.3)   |                  | -0.3 (-0.4 to -0.2) | <.0001 |                      |        |
|                | 2  | 14        | 1.5 (0.4)    |             |                  |                     |        |                      |        |
|                | 1  | 57        | 1.6 (0.5)    |             | 1.7 (0.5)        | 0.1 (0.0 to 0.2)    | 0.0916 | 0.0 (-0.2 to 0.1)    |        |
|                | 1  | 18        | 1.6 (0.5)    |             |                  |                     |        |                      |        |
|                | 2  | 56        | 1.6 (0.4)    |             | 1.7 (0.4)        | 0.1 (0.0 to 0.2)    | 0.0073 |                      |        |
| 2              | 56 | 1.6 (0.4) |              | 1.7 (0.4)   | 0.1 (0.0 to 0.2) | 0.0073              |        |                      |        |

|                   |   |    |           |           |           |                    |        |                   |        |
|-------------------|---|----|-----------|-----------|-----------|--------------------|--------|-------------------|--------|
|                   | 2 | 20 | 1.3 (0.3) |           |           |                    |        |                   |        |
| LDL<br>kolesterol | 1 | 63 | 3.2 (1.0) | 3.4 (0.9) |           | 0.2 (0.0 to 0.4)   | 0.0474 | 0.0 (-0.3 to 0.3) | 0.9627 |
|                   | 1 | 12 | 3.2 (0.9) |           |           |                    |        |                   |        |
|                   | 2 | 62 | 3.3 (1.0) | 3.5 (1.0) |           | 0.2 (0.0 to 0.4)   | 0.0560 |                   |        |
|                   | 2 | 13 | 2.9 (1.0) |           |           |                    |        |                   |        |
|                   | 1 | 57 | 3.3 (0.9) |           | 3.4 (0.9) | 0.2 (0.0 to 0.4)   | 0.0858 | 0.1 (-0.2 to 0.4) | 0.4545 |
|                   | 1 | 18 | 3.1 (1.1) |           |           |                    |        |                   |        |
|                   | 2 | 56 | 3.3 (1.0) |           | 3.4 (1.1) | 0.1 (-0.1 to 0.3)  | 0.5089 |                   |        |
|                   | 2 | 19 | 3.1 (0.9) |           |           |                    |        |                   |        |
| Triglycerid       | 1 | 63 | 1.1 (0.6) | 1.4 (0.7) |           | 0.3 (0.1 to 0.5)   | 0.0002 | 0.1 (-0.1 to 0.4) | 0.2107 |
|                   | 1 | 12 | 1.5 (0.9) |           |           |                    |        |                   |        |
|                   | 2 | 62 | 1.4 (1.1) | 1.5 (0.9) |           | 0.2 (0.0 to 0.3)   | 0.0414 |                   |        |
|                   | 2 | 14 | 1.4 (1.2) |           |           |                    |        |                   |        |
|                   | 1 | 57 | 1.1 (0.7) |           | 1.2 (0.6) | 0.1 (-0.1 to 0.2)  | 0.3634 | 0.2 (0.0 to 0.5)  | 0.0466 |
|                   | 1 | 18 | 1.2 (0.8) |           |           |                    |        |                   |        |
|                   | 2 | 56 | 1.4 (1.2) |           | 1.2 (0.7) | -0.2 (-0.3 to 0.0) | 0.0563 |                   |        |
|                   | 2 | 20 | 1.4 (1.0) |           |           |                    |        |                   |        |
